# Supplementary material for: Prognostic or predictive value of circulating cytokines and angiogenic factors for initial treatment of multiple myeloma in the GIMEMA MM0305 randomized controlled trial
Source: Springer Nature journal article supplement (doi:10.1186/s13045-018-0691-4), 2019-01-09
Supplement: MOESM1 [file 16388116]

**Table S1:** CAF levels in serum and bone marrow plasma of MM patients.

| Total Patients |                 |                |                |                 |                |                |                 |                 |                 |
|----------------|-----------------|----------------|----------------|-----------------|----------------|----------------|-----------------|-----------------|-----------------|
| Sera           |                 |                |                |                 |                |                |                 |                 |                 |
|                | ANG-2 (pg/ml)   | FGF (pg/ml)    | HGF (pg/ml)    | IL8 (pg/ml)     | PDGF (pg/ml)   | TIMP-1 (pg/ml) | TIMP-2 (pg/ml)  | TNFalfa (pg/ml) | VEGF (pg/ml)    |
| <b>Number</b>  | 124             | 124            | 124            | 124             | 124            | 124            | 124             | 124             | 124             |
| <b>Mean±SD</b> | 264939±20833    | 15699±2857     | 66817±4080     | 818085±80798    | 110129±4071    | 769222±14283   | 415173±6061     | 42728±7779      | 619446±30566    |
| <b>(range)</b> | (13405-1072635) | (2259-344121)  | (9824-374475)  | (6805-2177235)  | (2112-229504)  | (11792-817657) | (17925-442738)  | (6404-671451)   | (15699-1815946) |
| BM plasmas     |                 |                |                |                 |                |                |                 |                 |                 |
|                | ANG-2 (pg/ml)   | FGF (pg/ml)    | HGF (pg/ml)    | IL8 (pg/ml)     | PDGF (pg/ml)   | TIMP-1 (pg/ml) | TIMP-2 (pg/ml)  | TNFalfa (pg/ml) | VEGF (pg/ml)    |
| <b>Number</b>  | 124             | 124            | 124            | 124             | 124            | 124            | 124             | 124             | 124             |
| <b>Mean±SD</b> | 256710±21301    | 67013±15318    | 150319±12424   | 567520±63861    | 111452±4567    | 791141±10579   | 346229±9790     | 41955±3068      | 540654±25225    |
| <b>(range)</b> | (13405-1072261) | (8593-1041861) | (9824-493076)  | (17303-2177104) | (7489-211233)  | (30323-817657) | (17925-442738)  | (7792-192997)   | (33458-1510377) |
| V-MP           |                 |                |                |                 |                |                |                 |                 |                 |
| Sera           |                 |                |                |                 |                |                |                 |                 |                 |
|                | ANG-2 (pg/ml)   | FGF (pg/ml)    | HGF (pg/ml)    | IL8 (pg/ml)     | PDGF (pg/ml)   | TIMP-1 (pg/ml) | TIMP-2 (pg/ml)  | TNFalfa (pg/ml) | VEGF (pg/ml)    |
| <b>Number</b>  | 53              | 53             | 53             | 53              | 53             | 53             | 53              | 53              | 53              |
| <b>Mean±SD</b> | 255827±26922    | 12108±8489     | 71901±7824     | 878205±130492   | 106373±5863    | 790400±15528   | 424626±5966     | 47243±12964     | 679089±43561    |
| <b>(range)</b> | (32604-971297)  | (2673-31663)   | (17809-374475) | (6805-2177235)  | (2112-202310)  | (11792-817657) | (159984-442738) | (8423-658833)   | (15699-1815946) |
| BM plasmas     |                 |                |                |                 |                |                |                 |                 |                 |
|                | ANG-2 (pg/ml)   | FGF (pg/ml)    | HGF (pg/ml)    | IL8 (pg/ml)     | PDGF (pg/ml)   | TIMP-1 (pg/ml) | TIMP-2 (pg/ml)  | TNFalfa (pg/ml) | VEGF (pg/ml)    |
| <b>Number</b>  | 53              | 53             | 53             | 53              | 53             | 53             | 53              | 53              | 53              |
| <b>Mean±SD</b> | 264260±37738    | 91784±32738    | 155366±19330   | 547656±100662   | 116460±7474    | 785809±17588   | 345475±15051    | 39519±3474      | 567349±43133    |
| <b>(range)</b> | (13405-1072261) | (8608-1041861) | (9824-493076)  | (17303-2177104) | (11100-211233) | (82385-817657) | (17925-442738)  | (14827-132839)  | (33458-1309659) |
| V-MPT          |                 |                |                |                 |                |                |                 |                 |                 |
| Sera           |                 |                |                |                 |                |                |                 |                 |                 |
|                | ANG-2 (pg/ml)   | FGF (pg/ml)    | HGF (pg/ml)    | IL8 (pg/ml)     | PDGF (pg/ml)   | TIMP-1 (pg/ml) | TIMP-2 (pg/ml)  | TNFalfa (pg/ml) | VEGF (pg/ml)    |
| <b>Number</b>  | 71              | 71             | 71             | 71              | 71             | 71             | 71              | 71              | 71              |
| <b>Mean±SD</b> | 271741±30471    | 18378±4941     | 63022±4083     | 773206±102589   | 112932±5616    | 753413±22001   | 408116±9558     | 39357±9597      | 574925±41817    |
| <b>(range)</b> | (13405-1272561) | (2259-344121)  | (9824-159319)  | (9064-2475784)  | (4061-229504)  | (24447-817657) | (17925-442738)  | (6404-671451)   | (33458-1254471) |
| BM plasmas     |                 |                |                |                 |                |                |                 |                 |                 |
|                | ANG-2 (pg/ml)   | FGF (pg/ml)    | HGF (pg/ml)    | IL8 (pg/ml)     | PDGF (pg/ml)   | TIMP-1 (pg/ml) | TIMP-2 (pg/ml)  | TNFalfa (pg/ml) | VEGF (pg/ml)    |
| <b>Number</b>  | 71              | 71             | 71             | 71              | 71             | 71             | 71              | 71              | 71              |
| <b>Mean±SD</b> | 251074±24528    | 48475±10696    | 146551±16310   | 582348±83001    | 107714±5705    | 795121±13091   | 346791±12980    | 43773±4700      | 520727±30129    |
| <b>(range)</b> | (19810-1125635) | (8593-495306)  | (11880-493076) | (18034-2365982) | (7489-181369)  | (30323-817657) | (26279-442738)  | (7792-192997)   | (97211-1639584) |

**Table S2:** Cut-off for serum levels of cytokines and angiogenic factors (CAFs)

| CAFs             | Cut-off (pg/ml) | AUC    | St. Error | 95% CI           | Sensitivity% | 95% CI           | Specificity% | 95% CI           | Likelihood ratio | P value |
|------------------|-----------------|--------|-----------|------------------|--------------|------------------|--------------|------------------|------------------|---------|
| <b>Ang-2</b>     | 5000            | 0,8028 | 0,03477   | 0.7346 to 0.8710 | 66,15        | 53.35% to 77.43% | 65,88        | 54.80% to 75.82% | 1,94             | <0.0001 |
| <b>FGF-2</b>     | 950             | 0,9814 | 0,008262  | 0.9652 to 0.9976 | 93,85        | 84.99% to 98.30% | 94,12        | 86.80% to 98.06% | 15,95            | <0.0001 |
| <b>HGF</b>       | 2000            | 0,8260 | 0,03350   | 0.7603 to 0.8916 | 76,92        | 64.81% to 86.47% | 77,65        | 67.31% to 85.97% | 3,44             | <0.0001 |
| <b>IL-8</b>      | 35000           | 0,8338 | 0,03313   | 0.7688 to 0.8987 | 76,92        | 64.81% to 86.47% | 75,29        | 64.75% to 84.01% | 3,11             | <0.0001 |
| <b>PDGF</b>      | 3800            | 0,7449 | 0,04002   | 0.6664 to 0.8233 | 67,69        | 54.95% to 78.77% | 68,24        | 57.24% to 77.92% | 2,13             | <0.0001 |
| <b>TNF-alpha</b> | 1200            | 0,7962 | 0,03656   | 0.7245 to 0.8679 | 73,85        | 61.46% to 83.97% | 74,12        | 63.48% to 83.01% | 2,85             | <0.001  |
| <b>VEGF</b>      | 19000           | 0,8450 | 0,03108   | 0.7841 to 0.9059 | 75,38        | 63.13% to 85.23% | 75,29        | 64.75% to 84.01% | 3,05             | <0.0001 |

**Table S3.** PFS and OS correlation with CAF levels

| Cytokine        | ANG-2<br><5000 | ANG-2<br>>5000 | p  | FGF-2<br><950 | FGF-2<br>>950 | p            | HGF<br><2000 | HGF<br>>2000 | p            | IL-8<br><35000 | IL-8<br>>35000 | p          | PDGF-BB<br><3800 | PDGF-BB<br>>3800 | p   | TNF- $\alpha$<br><1200 | TNF- $\alpha$<br>>1200 | p           | VEGF<br><19000 | VEGF<br><19000 | p           |
|-----------------|----------------|----------------|----|---------------|---------------|--------------|--------------|--------------|--------------|----------------|----------------|------------|------------------|------------------|-----|------------------------|------------------------|-------------|----------------|----------------|-------------|
| <b>All pts</b>  |                |                |    |               |               |              |              |              |              |                |                |            |                  |                  |     |                        |                        |             |                |                |             |
| Mean PFS months | 32             | 24.5           | .5 | 36.5          | 15            | <b>.0001</b> | 32           | 18.5         | <b>.01</b>   | 29             | 20.5           | <b>.01</b> | 27               | 24               | .8  | 33                     | 19.5                   | <b>.03</b>  | 29             | 21             | <b>.001</b> |
| Mean OS months  | 61             | 50.5           | .1 | 67            | 38            | <b>.0006</b> | 63           | 49           | .1           | 63             | 49             | .3         | 63               | 49               | .1  | 62                     | 44                     | .3          | 65             | 45             | <b>.004</b> |
| <b>VMP</b>      |                |                |    |               |               |              |              |              |              |                |                |            |                  |                  |     |                        |                        |             |                |                |             |
| Mean PFS months | 29             | 22             | .1 | 35            | 16            | <b>.0001</b> | 31           | 18           | <b>.0001</b> | 27             | 20             | .3         | 25               | 20               | .9  | 32.5                   | 18                     | <b>.003</b> | 25             | 20.5           | <b>.04</b>  |
| Mean OS months  | 62             | 46             | .7 | 66            | 38            | <b>.006</b>  | 64           | 44           | .09          | 63             | 44             | .06        | 63               | 46               | .06 | 65                     | 38                     | .07         | 63             | 45             | <b>.04</b>  |
| <b>VMPT-VT</b>  |                |                |    |               |               |              |              |              |              |                |                |            |                  |                  |     |                        |                        |             |                |                |             |
| Mean PFS months | 32             | 29             | .6 | 40            | 15            | <b>.004</b>  | 32           | 22           | .8           | 32             | 21             | .5         | 32               | 29               | .7  | 35                     | 22                     | .6          | 32             | 23             | <b>.02</b>  |
| Mean OS months  | 61             | 62             | .3 | 67            | 40            | <b>.04</b>   | 60           | 62           | .8           | 61             | 62             | .5         | 65               | 60               | .8  | 60                     | 62                     | .9          | 65             | 49             | <b>.03</b>  |
